# Supplementary material
Source: ML conference proceedings conference paper supplement (https://proceedings.mlr.press/v32/bhojanapalli14.html)
Supplement: Supplementary file 1 [file bhojanapalli14-supp.zip]

## A. Proof of second part of Theorem 4.1

*Proof.* From the first part of Theorem 4.1 we get that  $\left\| \frac{n}{d} P_\Omega(M) - M \right\| \leq \frac{C\mu_0 r}{\sqrt{d}} \|M\|$ . Hence by Weyl's inequalities we get that

$$\left| \frac{n}{d} \sigma_k(P_\Omega(M)) - \sigma_k(M) \right| \leq \frac{C\mu_0 r}{\sqrt{d}} \|M\|,$$

for all  $i$ . Since  $M$  is rank- $r$  matrix, for any  $k \geq r + 1$ ,  $\frac{n}{d} \sigma_k(P_\Omega(M)) \leq \frac{C\mu_0 r}{\sqrt{d}} \|M\|$ . Hence by triangle inequality we get for any  $k \geq r$ ,

$$\begin{aligned} \left\| \frac{n}{d} P_k(P_\Omega(M)) - M \right\| &\leq \left\| \frac{n}{d} P_k(P_\Omega(M)) - \frac{n}{d} P_\Omega(M) \right\| + \left\| \frac{n}{d} P_\Omega(M) - M \right\| \\ &\leq \frac{n}{d} \sigma_{k+1}(P_\Omega(M)) + \left\| \frac{n}{d} P_\Omega(M) - M \right\| \\ &\leq \frac{2C\mu_0 r}{\sqrt{d}} \|M\|. \end{aligned}$$

□

## B. Proof of Claim 5.1

*Proof.* Let  $S$  be a set of size  $|S| = d$ . Since  $\frac{n_1}{d} \sum_{k \in S} U^k U^{kT} - I$  is a Hermitian matrix,

$$\left\| \frac{n_1}{d} \sum_{k \in S} U^k U^{kT} - I \right\| = \left\| \frac{n_1}{d} U_S \right\|^2 - 1, \quad (14)$$

where  $U_S$  is a matrix whose columns are  $U^k$ ,  $k \in S$ . Now we will use equation (8) to bound  $\|U_S\|$ .

$$\begin{aligned} \|U_S\|^2 &= \max_{x: \|x\|=1} \|U_S x\|^2 = \max_{x: \|x\|=1} \sum_{i,j=1}^d \langle U^i, U^j \rangle x_i x_j \\ &= \max_{x: \|x\|=1} \sum_{i=1}^d \|U^i\|^2 x_i^2 + \sum_{i \neq j} \langle U^i, U^j \rangle x_i x_j \\ &\leq \max_{x: \|x\|=1} \|x\|^2 \frac{r + \mu_1 \sqrt{r}}{n} + (d-1) \|x\|^2 \frac{\mu_1 \sqrt{r}}{n} \\ &= \frac{r + d\mu_1 \sqrt{r}}{n}. \end{aligned} \quad (15)$$

$\zeta_1$  follows from (8). Hence from (14) and (15) we get,

$$\delta_d \leq \frac{r}{d} + \mu_1 \sqrt{r} - 1 \leq \mu_1 \sqrt{r}.$$

□

## C. Proof of Claim 5.2

*Proof.* Let  $M = UV^T$  where  $U \in \mathbb{R}^{n \times 2}$  and  $V \in \mathbb{R}^{n \times 2}$  are both orthonormal matrices. Now, let  $S = \{j \text{ s.t., } (1, j) \in \Omega \text{ or } (2, j) \in \Omega\}$  be the set of all the columns of  $M$  that have an observed entry in any of the first two rows.

As  $|\Omega| = n^2/4$ , hence wlog we can assume that  $|S| \leq n/2$ . Let  $S' = S \cup S_1$ , where  $S_1$  is any set of columns s.t.  $|S'| = n/2$ . Now, construct  $U, V$  as follows:

$$V^j = \begin{cases} [\frac{1}{\sqrt{n}} & \frac{1}{\sqrt{n}}], & \forall j \in S', \\ [\frac{1}{\sqrt{n}} & \frac{-1}{\sqrt{n}}], & \forall j \notin S', \end{cases} \quad (16)$$

$$U^i = \begin{cases} [\frac{1}{\sqrt{n}} & \frac{1}{\sqrt{n}}], & \forall 3 \leq i \leq n/2, \\ [\frac{1}{\sqrt{n}} & -\frac{1}{\sqrt{n}}], & \forall n/2 + 1 \leq i \leq n, \\ [a & -a], & i = 1, \\ [b & -b], & i = 2. \end{cases} \quad (17)$$

Note that by construction,  $M_{ij} = 0, \forall 1 \leq i \leq 2, j \in S'$ . That is, the first two rows of  $P_\Omega(M)$  are all zeros. Since,  $U^1, U^2$  participate in only those rows. Hence, even if  $V$  is known *exactly*, one cannot obtain any information about  $a, b$  from the observed entries. Only other constraints on  $a, b$  comes from orthonormality of  $U$ , which reduces to  $a^2 + b^2 = 2/n$ . Now, without violating incoherence assumptions, we can have *multiple* solutions to the above given equation that cannot be distinguished from each other. For example,  $a = \frac{1}{\sqrt{2n}}$  and  $b = \sqrt{\frac{3}{2n}}$ , or vice-versa, i.e.,  $a = \sqrt{\frac{3}{2n}}$  and  $b = \frac{1}{\sqrt{2n}}$ .

Hence, exact recovery is not possible for the above given  $M$  for any  $\Omega$  s.t.  $|\Omega| \leq n^2/4$ .  $\square$

## D. Proofs of Lemmas used to prove Theorem 4.2

In this section we present the proofs of all the lemmas used to prove theorem 4.2.

**Lemma (7.1).** *Let  $M = U\Sigma V^T$  satisfy A1, A2 and let the graph  $G$  that generates  $\Omega$  satisfy G1, G2 (see Section 3). Then, for any matrix  $Z \in T$ ,*

$$\|\frac{n}{d}\mathcal{P}_T P_\Omega(Z) - Z\|_F \leq \sqrt{2(\delta_d^2 + \frac{C^2 \mu_0^2 r^2}{d})} \|Z\|_F.$$

*Proof of Lemma 7.1.* Since  $Z \in T$ , we can write  $Z = UX^T + YV^T$ , such that  $Y$  and  $U$  are orthogonal.  $\|\frac{n}{d}\mathcal{P}_T P_\Omega(Z) - Z\|_F \leq \|\frac{n}{d}\mathcal{P}_T P_\Omega(UX^T) - UX^T\|_F + \|\frac{n}{d}\mathcal{P}_T P_\Omega(YV^T) - YV^T\|_F$ . Since both the above summands are similar we will bound the first term and then extend the results to the second one. Now,

$$\|\frac{n}{d}\mathcal{P}_T P_\Omega(UX^T) - UX^T\|_F^2 = \|UU^T(\frac{n}{d}P_\Omega(UX^T) - UX^T)\|_F^2 + \|(I - UU^T)\frac{n}{d}P_\Omega(UX^T)VV^T\|_F^2,$$

as both the terms on RHS are orthogonal to each other. Next, we bound both of these terms individually.

$$\begin{aligned} 1) \|UU^T(\frac{n}{d}P_\Omega(UX^T) - UX^T)\|_F^2 &= \sum_{ij} \left( U^{iT} \left( \frac{n}{d} \sum_k U^k U^{kT} G_{kj} - I \right) X^j \right)^2 \\ &= \sum_j \sum_i \left( U^{iT} \left( \frac{n}{d} \sum_k U^k U^{kT} G_{kj} - I \right) X^j \right)^2 \\ &\stackrel{\zeta_1}{=} \sum_j \left\| \left( \frac{n}{d} \sum_k U^k U^{kT} G_{kj} - I \right) X^j \right\|^2 \stackrel{\zeta_2}{\leq} \sum_j \delta_d^2 \|X^j\|^2 = \delta_d^2 \|X\|_F^2, \end{aligned}$$

where  $\zeta_2$  follows from the assumption A2 and from the fact that  $G$  is  $d$ -regular, and  $\zeta_1$  follows by using:

$$\sum_{i=1}^n (U^{iT} x)^2 = \sum_{i=1}^n x^T U^i U^{iT} x = x^T \left( \sum_{i=1}^n U^i U^{iT} \right) x = x^T U^T U x = \|x\|^2.$$

$$\begin{aligned} 2) \|(I - UU^T)\frac{n}{d}P_\Omega(UX^T)VV^T\|_F^2 &= \|(I - UU^T)\frac{n}{d}P_\Omega(UX^T)V\|_F^2 = \sum_{i=1}^r \|(I - UU^T)\frac{n}{d}P_\Omega(UX^T)V_i\|_2^2 \\ &\stackrel{\zeta_1}{=} \sum_{i=1}^r \max_{\tilde{u}: \|\tilde{u}\| \leq 1 \text{ \& } \tilde{u}^T U = 0} \|\tilde{u}^T \frac{n}{d}P_\Omega(UX^T)V_i\|^2, \end{aligned}$$

where  $\zeta_1$  follows from the definition of the spectral norm. Now, we bound  $\|\tilde{u}^T \frac{n}{d} P_\Omega(UX^T)V_i\|^2$  over  $\{\tilde{u} : \|\tilde{u}\| \leq 1 \text{ \& } \tilde{u}^T U = 0\}$ . Note that  $\tilde{u}^T U_k = 0$  implies that  $\tilde{u} \cdot U_k$  is orthogonal to all ones vector.

$$\begin{aligned} \sum_{i=1}^r \|\tilde{u}^T \frac{n}{d} P_\Omega(\sum_{k=1}^r U_k X_k^T) V_i\|^2 &= \sum_{i=1}^r \|\frac{n}{d} \sum_{k=1}^r (U_k \cdot \tilde{u})^T G(X_k \cdot V_i)\|^2 \stackrel{\zeta_1}{\leq} \sum_{i=1}^r \frac{n^2 C^2}{d} \left( \sum_{k=1}^r \|U_k \cdot \tilde{u}\| \|X_k \cdot V_i\| \right)^2 \\ &\leq \sum_{i=1}^r \frac{n^2 C^2}{d} \left( \sum_{k=1}^r \|U_k \cdot \tilde{u}\|^2 \right) \left( \sum_{k=1}^r \|X_k \cdot V_i\|^2 \right) \stackrel{\zeta_2}{\leq} \frac{C^2 \mu_0^2 r^2}{d} \|\tilde{u}\|^2 \|X\|_F^2. \end{aligned}$$

$\zeta_1$  follows from the assumption  $G2$  and  $\zeta_2$  from incoherence property  $A1$ . Using the above two bounds we get  $\|\frac{n}{d} \mathcal{P}_T P_\Omega(UX^T) - UX^T\|_F^2 \leq \|X\|_F^2 (\delta_d^2 + \frac{C^2 \mu_0^2 r^2}{d})$ . Similarly  $\|\frac{n}{d} \mathcal{P}_T P_\Omega(YV^T)\|_F^2 \leq \|Y\|_F^2 (\delta_d^2 + \frac{C^2 \mu_0^2 r^2}{d})$ . Hence

$$\|\frac{n}{d} \mathcal{P}_T P_\Omega(Z) - Z\|_F \leq \sqrt{2(\delta_d^2 + \frac{C^2 \mu_0^2 r^2}{d})} \|Z\|_F.$$

□

**Lemma (7.2).** Let  $Z \in T$ , i.e.,  $Z = UX^T + YV^T$  and  $Y$  is orthogonal to  $U$ , and  $X$  and  $Y$  be incoherent, i.e.,

$$\|X^i\|^2 \leq \frac{c_1^2 \mu_0 r}{n}, \quad \|Y^j\|^2 \leq \frac{c_2^2 \mu_0 r}{n}.$$

Let  $\Omega$  satisfy the assumptions  $G1$  and  $G2$ , then:

$$\|\frac{n}{d} P_\Omega(Z) - Z\| \leq (c_1 + c_2) \frac{C \mu_0 r}{\sqrt{d}}.$$

*Proof of Lemma 7.2.* Note that  $\|\frac{n}{d} P_\Omega(Z) - Z\| \leq \|\frac{n}{d} P_\Omega(UX^T) - UX^T\| + \|\frac{n}{d} P_\Omega(YV^T) - YV^T\|$  by triangle inequality. First we will bound  $\|\frac{n}{d} P_\Omega(UX^T) - UX^T\|$ . The proof follows the same line as proof of Theorem 4.1.

$$\begin{aligned} \|\frac{n}{d} P_\Omega(UX^T) - UX^T\| &= \max_{\{a,b: \|a\|=1, \|b\|=1\}} a^T \left( \frac{n}{d} P_\Omega(UX^T) - UX^T \right) b \\ &= \max_{\{a,b: \|a\|=1, \|b\|=1\}} \sum_{i=1}^r \left( \frac{n}{d} (a \cdot U_i)^T G(X_i \cdot b) - (a^T U_i)(X_i^T b) \right) \end{aligned} \quad (18)$$

Let  $a \cdot U_i = \alpha_i \mathbf{1} + \beta_i \mathbf{1}_\perp^i$ . Then  $\alpha_i = \frac{(a^T U_i)}{n}$  and  $\beta_i^2 \leq \|a \cdot U_i\|^2$ . Hence,

$$\begin{aligned} a^T \left( \frac{n}{d} P_\Omega(UX^T) - UX^T \right) b &= \sum_{i=1}^r \left( (a^T U_i)(X_i^T b) + \frac{n}{d} \beta_i \mathbf{1}_\perp^i{}^T G(X_i \cdot b) - (a^T U_i)(X_i^T b) \right) \\ &\stackrel{\zeta_1}{\leq} \sum_{i=1}^r \frac{Cn}{\sqrt{d}} \beta_i \|X_i \cdot b\| \stackrel{\zeta_2}{\leq} \frac{Cn}{\sqrt{d}} \sqrt{\sum_{i=1}^r \beta_i^2} \sqrt{\sum_{i=1}^r \|X_i \cdot b\|^2}, \end{aligned} \quad (19)$$

where  $\zeta_1$  follows from assumption  $G2$  and  $\zeta_2$  from Cauchy-Schwarz inequality. Now

$$\sum_{i=1}^r \beta_i^2 \leq \sum_{i=1}^r \|a \cdot U_i\|^2 = \sum_{j=1}^n \sum_{i=1}^r a_j^2 U_{ji}^2 \leq \frac{\mu_0 r}{n} \sum_{j=1}^n a_j^2 = \frac{\mu_0 r}{n}.$$

Similarly  $\sum_{i=1}^r \|X_i \cdot b\|^2 \leq \frac{c_1^2 \mu_0 r}{n}$ . Hence using (18), (19) and above two inequalities we get

$$\|\frac{n}{d} P_\Omega(UX^T) - UX^T\| \leq \frac{c_1 C \mu_0 r}{\sqrt{d}}.$$

Similarly we can show that  $\|\frac{n}{d} P_\Omega(YV^T) - YV^T\| \leq \frac{c_2 C \mu_0 r}{\sqrt{d}}$ . Hence the lemma follows from the above two bounds. □

**Lemma (7.3).** Let  $Z \in T$ , i.e.,  $Z = UX^T + YV^T$  and  $Y$  is orthogonal to  $U$ . Let  $X$  and  $Y$  be incoherent, i.e.,

$$\|X^i\|^2 \leq \frac{c_1^2 \mu_0 r}{n}, \quad \|Y^j\|^2 \leq \frac{c_2^2 \mu_0 r}{n}.$$

Let  $\tilde{Z} = Z - \frac{n}{d} \mathcal{P}_T P_\Omega(Z)$ . Then, the following holds for all  $M, \Omega$  that satisfy the conditions given in Lemma 7.1:

- $\|\tilde{Z}\|_\infty \leq \frac{(c_1+c_2)\mu_0 r}{n}(\delta_d + \frac{C\mu_0 r}{\sqrt{d}})$ .
- $\tilde{Z} = U\tilde{X}^T + \tilde{Y}V^T$  and  $\tilde{X}$  and  $\tilde{Y}$  are incoherent.  $\|\tilde{X}^i\|^2 \leq \frac{\mu_0 r}{n} \left( \delta_d c_1 + 2c_2 \frac{C\mu_0 r}{\sqrt{d}} \right)^2$  and  $\|\tilde{Y}^j\|^2 \leq \frac{\mu_0 r}{n} (\delta_d c_2 + (c_1 + c_2) \frac{C\mu_0 r}{\sqrt{d}})^2$ .

*Proof of Lemma 7.3.*

$$\begin{aligned} \tilde{Z}_{ij} = (Z - \frac{n}{d} \mathcal{P}_T P_\Omega(Z))_{ij} &= \left( UU^T(UX^T - \frac{n}{d} P_\Omega(UX^T)) - (I - UU^T)(\frac{n}{d} P_\Omega(UX^T))VV^T \right)_{ij} \\ &\quad + \left( (YV^T - \frac{n}{d} P_\Omega(YV^T))VV^T - UU^T \frac{n}{d} P_\Omega(YV^T)(I - VV^T)^T \right)_{ij}, \end{aligned}$$

where the last equality follows by using the definition of  $\mathcal{P}_T$  and the fact that  $Z = \mathcal{P}_T(Z)$ . Now, we bound the first term in the RHS of the above equation. To do this we individually bound  $(UU^T(UX^T - \frac{n}{d} P_\Omega(UX^T)))_{ij}$  and  $((I - UU^T)(\frac{n}{d} P_\Omega(UX^T))VV^T)_{ij}$ :

$$(UU^T(UX^T - \frac{n}{d} P_\Omega(UX^T)))_{ij} = U^{iT} \left( I - \frac{n}{d} \sum_{k=1}^n U^k U^{k^T} G_{kj} \right) X^j \stackrel{\zeta_1}{\leq} \delta_d \|U^i\| \|X^j\| \stackrel{\zeta_2}{\leq} \frac{\delta_d c_1 \mu_0 r}{n},$$

where  $\zeta_1$  follows from A2 and  $\zeta_2$  from the incoherence property A1 and the hypothesis of the lemma.

Similarly,

$$\begin{aligned} \left| ((I - UU^T)(\frac{n}{d} P_\Omega(UX^T))VV^T)_{ij} \right| &= \left| U_\perp^{iT} U_\perp^T (\frac{n}{d} P_\Omega(UX^T))VV^j \right| = \left| \hat{u} \frac{n}{d} \sum_{k=1}^r P_\Omega(U_k X_k^T) \hat{v} \right| \\ &= \left| \frac{n}{d} \sum_{k=1}^r (\hat{u} \cdot U_k)^T G(X_k \cdot \hat{v}) \right| \stackrel{\zeta_1}{\leq} \frac{Cn}{\sqrt{d}} \sum_{k=1}^r \|\hat{u} \cdot U_k\| \|X_k \cdot \hat{v}\|, \end{aligned}$$

where  $\hat{u} = U_\perp U_\perp^i$ ,  $\hat{v} = VV^j$ ,  $\mathbf{1}^T(\hat{u} \cdot U_k) = 0$  and  $\zeta_1$  follows from G2. Now note that,

$$\sum_{k=1}^r \|\hat{u} \cdot U_k\|^2 = \sum_{k=1}^r \sum_{l=1}^n \langle U_\perp^i, U_\perp^l \rangle^2 U_{lk}^2 = \sum_{l=1}^n \langle U^i, U^l \rangle^2 \|U^l\|^2 \leq (\frac{\mu_0 r}{n})^2.$$

Using this we can finish the bound as follows:

$$\frac{Cn}{\sqrt{d}} \sum_{k=1}^r \|\hat{u} \cdot U_k\| \|X_k \cdot \hat{v}\| \stackrel{\zeta_1}{\leq} \frac{Cn}{\sqrt{d}} \sqrt{\frac{\mu_0 r}{n} \frac{c_1^2 \mu_0 r}{n}} \|U^i\| \|V^j\| \stackrel{\zeta_2}{\leq} \frac{Cn}{\sqrt{d}} \frac{\mu_0 r}{n} \frac{c_1 \mu_0 r}{n} = \frac{C\mu_0^2 r^2 c_1}{n\sqrt{d}},$$

where  $\zeta_1$  follows from hypothesis of the lemma and  $\zeta_2$  from the incoherence property A1.

Putting the two bounds together we get

$$\left( UU^T(UX^T - \frac{n}{d} P_\Omega(UX^T)) - (I - UU^T)(\frac{n}{d} P_\Omega(UX^T))VV^T \right)_{ij} \leq \frac{c_1 \mu_0 r}{n} (\delta_d + \frac{C\mu_0 r}{\sqrt{d}}).$$

Similarly,

$$\left( (YV^T - \frac{n}{d} P_\Omega(YV^T))VV^T - UU^T \frac{n}{d} P_\Omega(YV^T)(I - VV^T)^T \right)_{ij} \leq \frac{c_2 \mu_0 r}{n} (\delta_d + \frac{C\mu_0 r}{\sqrt{d}}).$$

Hence each element of  $Z$  is bounded by,

$$\tilde{Z}_{ij} \leq \frac{(c_1 + c_2)\mu_0 r}{n} (\delta_d + \frac{C\mu_0 r}{\sqrt{d}}).$$

Now,

$$(U\tilde{X}^T)_{ij} = (UU^T\tilde{Z})_{ij} = (UU^T(Z - \frac{n}{d}\mathcal{P}_T P_\Omega(Z)))_{ij} = (UU^T(UX^T - \frac{n}{d}P_\Omega(UX^T) - \frac{n}{d}P_\Omega(YV^T)))_{ij}.$$

Note that  $(UU^T \frac{n}{d}P_\Omega(YV^T))_{ij} = (UU^T \frac{n}{d}P_\Omega(YV^T)VV^T + UU^T \frac{n}{d}P_\Omega(YV^T)(I - VV^T))_{ij}$ . Hence,

$$\begin{aligned} \|\tilde{X}^j\|^2 &= \sum_{i=1}^n (U\tilde{X}^T)_{ij}^2 \\ &= \sum_{i=1}^n \left( U^{iT} \left( I - \frac{n}{d} \sum_{k=1}^n U^k U^{kT} G_{kj} \right) X^j - U^{iT} U^T \frac{n}{d} P_\Omega \left( \sum_{k=1}^r Y_k V_k^T \right) VV^j - U^{iT} U^T \frac{n}{d} P_\Omega \left( \sum_{k=1}^r Y_k V_k^T \right) V_\perp V_\perp^j \right)^2 \\ &\stackrel{\zeta_1}{=} \left\| \left( I - \frac{n}{d} \sum_{k=1}^n U^k U^{kT} G_{kj} \right) X^j - U^T \frac{n}{d} P_\Omega \left( \sum_{k=1}^r Y_k V_k^T \right) VV^j - U^T \frac{n}{d} P_\Omega \left( \sum_{k=1}^r Y_k V_k^T \right) V_\perp V_\perp^j \right\|^2 \\ &\leq \left( \left\| \left( I - \frac{n}{d} \sum_{k=1}^n U^k U^{kT} G_{kj} \right) X^j \right\| + \left\| U^T \frac{n}{d} P_\Omega \left( \sum_{k=1}^r Y_k V_k^T \right) VV^j \right\| + \left\| U^T \frac{n}{d} P_\Omega \left( \sum_{k=1}^r Y_k V_k^T \right) V_\perp V_\perp^j \right\| \right)^2, \end{aligned}$$

where,  $\zeta_1$  follows by the following:

$$\sum_{i=1}^n (U^{iT} x)^2 = \sum_{i=1}^n x^T U^i U^{iT} x = x^T \left( \sum_{i=1}^n U^i U^{iT} \right) x = x^T U^T U x = \|x\|^2.$$

Next, we bound each of the above three terms individually. First term  $\left\| \left( I - \frac{n}{d} \sum_{k=1}^n U^k U^{kT} G_{kj} \right) X^j \right\|$  is bounded by  $\delta_d \sqrt{\frac{c_1^2 \mu_0 r}{n}}$ , which follows from the assumption A2 and the hypothesis of the lemma. Next, we consider the second and third terms.

$$\begin{aligned} 2) \left\| U^T \frac{n}{d} P_\Omega \left( \sum_{k=1}^r Y_k V_k^T \right) VV^j \right\| &= \max_{a: \|a\| \leq 1} a^T U^T \frac{n}{d} P_\Omega \left( \sum_{k=1}^r Y_k V_k^T \right) VV^j = \max_{a: \|a\| \leq 1} \frac{n}{d} \sum_{k=1}^r ((Ua \cdot Y_k)^T G(V_k \cdot \hat{v})) \\ &\stackrel{\zeta_1}{\leq} \max_{a: \|a\| \leq 1} \frac{Cn}{\sqrt{d}} \sum_{k=1}^r \|Ua \cdot Y_k\| \|V_k \cdot \hat{v}\| \leq \max_{a: \|a\| \leq 1} \frac{Cn}{\sqrt{d}} \sqrt{\sum_{k=1}^r \|Ua \cdot Y_k\|^2} \sqrt{\sum_{k=1}^r \|V_k \cdot \hat{v}\|^2} \stackrel{\zeta_2}{\leq} \max_{a: \|a\| \leq 1} \frac{Cn}{\sqrt{d}} \sqrt{\frac{c_2^2 \mu_0 r}{n}} \|a\| \frac{\mu_0 r}{n} \\ &= \sqrt{\frac{C^2 c_2^2 \mu_0^3 r^3}{nd}}, \end{aligned}$$

where  $\hat{v} = VV^j$  and  $a^T U^T Y_k = 0$ .  $\zeta_1$  follows from the assumption G2 and  $\zeta_2$  from the assumption A1 and the hypothesis of the lemma.

$$\begin{aligned} 3) \left\| U^T \frac{n}{d} P_\Omega \left( \sum_{k=1}^r Y_k V_k^T \right) V_\perp V_\perp^j \right\| &= \max_{a: \|a\| \leq 1} a^T U^T \frac{n}{d} P_\Omega \left( \sum_{k=1}^r Y_k V_k^T \right) V_\perp V_\perp^j = \max_{a: \|a\| \leq 1} \frac{n}{d} \sum_{k=1}^r ((Ua \cdot Y_k)^T G(V_k \cdot \hat{v})) \\ &\stackrel{\zeta_1}{\leq} \max_{a: \|a\| \leq 1} \frac{Cn}{\sqrt{d}} \sum_{k=1}^r \|Ua \cdot Y_k\| \|V_k \cdot \hat{v}\| \leq \max_{a: \|a\| \leq 1} \frac{Cn}{\sqrt{d}} \sqrt{\sum_{k=1}^r \|Ua \cdot Y_k\|^2} \sqrt{\sum_{k=1}^r \|V_k \cdot \hat{v}\|^2} \stackrel{\zeta_2}{\leq} \max_{a: \|a\| \leq 1} \frac{Cn}{\sqrt{d}} \sqrt{\frac{c_2^2 \mu_0 r}{n}} \|a\| \frac{\mu_0 r}{n} \\ &= \sqrt{\frac{C^2 c_2^2 \mu_0^3 r^3}{nd}}, \end{aligned}$$

where  $\hat{v} = V_\perp V_\perp^j$  and  $a^T U^T Y_k = 0$ .  $\zeta_1$  follows from G2 and  $\zeta_2$  from A1 and the hypothesis of the lemma. Using all the three bounds we can finally bound  $\|\tilde{X}^j\|^2$ .

$$\|\tilde{X}^j\|^2 \leq \left( \delta_d \sqrt{\frac{c_1^2 \mu_0 r}{n}} + \sqrt{\frac{C^2 c_2^2 \mu_0^3 r^3}{nd}} + \sqrt{\frac{C^2 c_2^2 \mu_0^3 r^3}{nd}} \right)^2 = \frac{\mu_0 r}{n} \left( \delta_d c_1 + 2c_2 \frac{C \mu_0 r}{\sqrt{d}} \right)^2.$$

Now, we bound the norm of rows of  $\tilde{Y}$ .

$$\begin{aligned} \|\tilde{Y}^i\|^2 &= \sum_{j=1}^n (\tilde{Y} V^T)_{ij}^2 \\ &= \sum_{j=1}^n \left( Y^{iT} \left( I - \frac{n}{d} \sum_{k=1}^n V^k V^{kT} G_{ik} \right) V^j + U^{iT} U^T \frac{n}{d} P_\Omega \left( \sum_{k=1}^r Y_k V_k^T \right) V V^j - U_\perp^{iT} U_\perp^T \left( \frac{n}{d} P_\Omega(U X^T) \right) V V^j \right)^2 \\ &= \left\| Y^{iT} \left( I - \frac{n}{d} \sum_{k=1}^n V^k V^{kT} G_{ik} \right) + U^{iT} U^T \frac{n}{d} P_\Omega \left( \sum_{k=1}^r Y_k V_k^T \right) V - U_\perp^{iT} U_\perp^T \left( \frac{n}{d} P_\Omega(U X^T) \right) V \right\|^2 \\ &\leq \left( \left\| Y^{iT} \left( I - \frac{n}{d} \sum_{k=1}^n V^k V^{kT} G_{ik} \right) \right\| + \left\| U^{iT} U^T \frac{n}{d} P_\Omega \left( \sum_{k=1}^r Y_k V_k^T \right) V \right\| + \left\| U_\perp^{iT} U_\perp^T \left( \frac{n}{d} P_\Omega(U X^T) \right) V \right\| \right)^2 \end{aligned}$$

Next, we bound each of the above three terms individually. First term  $\left\| Y^{iT} \left( I - \frac{n}{d} \sum_{k=1}^n V^k V^{kT} G_{ik} \right) \right\|$  is bounded by  $\delta_d \sqrt{\frac{c_2^2 \mu_0 r}{n}}$ , which follows from A2 and the hypothesis of the lemma. Now, we bound the second and third terms.

$$\begin{aligned} 2) \left\| U^{iT} U^T \frac{n}{d} P_\Omega \left( \sum_{k=1}^r Y_k V_k^T \right) V \right\|^2 &= \max_{b: \|b\| \leq 1} U^{iT} U^T \frac{n}{d} P_\Omega \left( \sum_{k=1}^r Y_k V_k^T \right) V b = \max_{b: \|b\| \leq 1} \frac{n}{d} \sum_{k=1}^r ((\hat{u} \cdot Y_k)^T G(V_k \cdot V b)) \\ &\stackrel{\zeta_1}{\leq} \max_{b: \|b\| \leq 1} \frac{Cn}{\sqrt{d}} \sum_{k=1}^r \|\hat{u} \cdot Y_k\| \|V_k \cdot V b\| \leq \max_{b: \|b\| \leq 1} \frac{Cn}{\sqrt{d}} \sqrt{\sum_{k=1}^r \|\hat{u} \cdot Y_k\|^2} \sqrt{\sum_{k=1}^r \|V_k \cdot V b\|^2} \stackrel{\zeta_2}{\leq} \max_{b: \|b\| \leq 1} \frac{Cn}{\sqrt{d}} \frac{c_2 \mu_0 r}{n} \sqrt{\frac{\mu_0 r}{n}} \|b\| \\ &= \sqrt{\frac{C^2 c_2^2 \mu_0^3 r^3}{nd}}, \end{aligned}$$

where  $\hat{u} = U U^i$  and  $\mathbf{1}^T(\tilde{u} \cdot Y_k) = 0$ .  $\zeta_1$  follows from G2 and  $\zeta_2$  from A1 and the hypothesis of the lemma.

$$\begin{aligned} 3) \left\| U_\perp^{iT} U_\perp^T \left( \frac{n}{d} P_\Omega(U X^T) \right) V \right\|^2 &= \max_{b: \|b\| \leq 1} U_\perp^{iT} U_\perp^T \left( \frac{n}{d} P_\Omega(U X^T) \right) V b = \max_{b: \|b\| \leq 1} \frac{n}{d} \sum_{k=1}^r ((\hat{u}_\perp \cdot U_k)^T G(X_k \cdot V b)) \\ &\stackrel{\zeta_1}{\leq} \max_{b: \|b\| \leq 1} \frac{Cn}{\sqrt{d}} \sum_{k=1}^r \|\hat{u}_\perp \cdot U_k\| \|X_k \cdot V b\| \leq \max_{b: \|b\| \leq 1} \frac{Cn}{\sqrt{d}} \sqrt{\sum_{k=1}^r \|\hat{u}_\perp \cdot U_k\|^2} \sqrt{\sum_{k=1}^r \|X_k \cdot V b\|^2} \stackrel{\zeta_2}{\leq} \max_{b: \|b\| \leq 1} \frac{Cn}{\sqrt{d}} \frac{\mu_0 r}{n} \sqrt{\frac{c_1^2 \mu_0 r}{n}} \|b\| \\ &= \sqrt{\frac{C^2 c_1^2 \mu_0^3 r^3}{nd}}, \end{aligned}$$

where  $\hat{u}_\perp = U_\perp U_\perp^i$  and  $\mathbf{1}^T(\tilde{u}_\perp \cdot U_k) = 0$ .  $\zeta_1$  follows from G2 and  $\zeta_2$  from A1 and the hypothesis of the lemma. Using all the three bounds we can finally bound  $\|\tilde{Y}^i\|^2$ .

$$\|\tilde{Y}^i\|^2 \leq \left( \delta_d \sqrt{\frac{c_2^2 \mu_0 r}{n}} + \sqrt{\frac{C^2 c_2^2 \mu_0^3 r^3}{nd}} + \sqrt{\frac{C^2 c_1^2 \mu_0^3 r^3}{nd}} \right)^2 = \frac{\mu_0 r}{n} \left( \delta_d c_2 + (c_1 + c_2) \frac{C \mu_0 r}{\sqrt{d}} \right)^2.$$

□

**Lemma (7.4).** *Let  $M, \Omega$  satisfy A1, A2 and G1, G2, respectively. Then,  $M$  is the unique optimum of (7), if there exists a  $Y \in \mathbb{R}^{n \times n}$  that satisfies the following:*

- $P_\Omega(Y) = Y$
- $\|\mathcal{P}_T(Y) - UV^T\|_F \leq \sqrt{\frac{d}{8n}}$
- $\|\mathcal{P}_{T^\perp}(Y)\| < \frac{1}{2}$

*Proof of Lemma 7.4.* For any  $Z$  such that,  $P_\Omega(Z) = 0$ , implies  $\|P_\Omega \mathcal{P}_{T^\perp}(Z)\| = \|P_\Omega \mathcal{P}_T(Z)\|$ . Also let  $\delta_d = \frac{C\mu_0 r}{\sqrt{d}} = \alpha$ .

$$\begin{aligned} \|P_\Omega \mathcal{P}_T(Z)\|_F &= \langle \mathcal{P}_T(Z), P_\Omega \mathcal{P}_T(Z) \rangle \stackrel{\zeta_1}{\geq} \frac{d}{n} \left(1 - \sqrt{2(\delta_d^2 + \frac{C^2 \mu_0^2 r^2}{d})}\right) \|\mathcal{P}_T(Z)\|_F^2 = \frac{d}{n} (1 - 2\alpha) \|\mathcal{P}_T(Z)\|_F^2 \\ &> \frac{d}{2n} \|\mathcal{P}_T(Z)\|_F^2, \end{aligned}$$

for  $\alpha < \frac{1}{4}$ .  $\zeta_1$  follows from Lemma 7.1. Also note that  $\|P_\Omega \mathcal{P}_{T^\perp}(Z)\|_F \leq \|\mathcal{P}_{T^\perp}(Z)\|_F$ . Hence,

$$\|\mathcal{P}_{T^\perp}(Z)\|_* \geq \|\mathcal{P}_{T^\perp}(Z)\|_F > \sqrt{\frac{d}{2n}} \|\mathcal{P}_T(Z)\|_F.$$

Now choose  $U_\perp$  and  $V_\perp$  from the SVD of  $\mathcal{P}_{T^\perp}(Z)$ , which ensures that  $\langle U_\perp V_\perp^T, \mathcal{P}_{T^\perp}(Z) \rangle = \|\mathcal{P}_{T^\perp}(Z)\|_*$ . Now,

$$\begin{aligned} \|M + Z\|_* &\stackrel{\zeta_1}{\geq} \langle UV^T + U_\perp V_\perp^T, M + Z \rangle \\ &= \|M\|_* + \langle UV^T + U_\perp V_\perp^T, Z \rangle \\ &\stackrel{\zeta_2}{=} \|M\|_* + \langle UV^T + U_\perp V_\perp^T, Z \rangle - \langle Y, Z \rangle \\ &= \|M\|_* + \langle UV^T - \mathcal{P}_T(Y), \mathcal{P}_T(Z) \rangle + \langle U_\perp V_\perp^T - \mathcal{P}_{T^\perp}(Y), \mathcal{P}_{T^\perp}(Z) \rangle \\ &\stackrel{\zeta_3}{\geq} \|M\|_* - \|UV^T - \mathcal{P}_T(Y)\|_F \|\mathcal{P}_T(Z)\|_F + \|\mathcal{P}_{T^\perp}(Z)\|_* - \|\mathcal{P}_{T^\perp}(Y)\| \|\mathcal{P}_{T^\perp}(Z)\|_* \\ &> \|M\|_* - \|UV^T - \mathcal{P}_T(Y)\|_F \|\mathcal{P}_T(Z)\|_F + (1 - \|\mathcal{P}_{T^\perp}(Y)\|) \sqrt{\frac{d}{2n}} \|\mathcal{P}_T(Z)\|_F \\ &\stackrel{\zeta_4}{>} \|M\|_*. \end{aligned}$$

$\zeta_1$  follows from the Holder's inequality and the fact that  $\|UV^T + U_\perp V_\perp^T\| = 1$ ;  $\zeta_2$  from  $\langle Y, Z \rangle = \langle P_\Omega(Y), Z \rangle = 0$ ;  $\zeta_3$  again from the Holder's inequality; and  $\zeta_4$  from the hypothesis of lemma.  $\square$
